# Supplementary material for: Engineering high Zn in tomato shoots through expression of AtHMA4 involves tissue-specific modification of endogenous genes
Source: PubMed Central journal article supplement (PMC4982198; doi:10.1186/s12864-016-2990-x), 2016-08-12

**Additional file 5: Reference gene selection for RT-qPCR gene transcription studies.** (a) microarray identification of differential expression of genes commonly used as references in **root** and **leaf** tissues of AtHMA4- expressing (L.4) and wild-type 17-day-old tomato plants grown in the presence of 5  $\mu$ M Zn; (b) transcription level of actin (ACT), tubulin (TUB), and cyclophilin (CyP) in the epidermis+cortex and stele of roots from AtHMA4- expressing (L.4) and wild type 24-day-old tomato plants grown in the presence of 5  $\mu$ M Zn; (c) Relative expression of cyclophilin in the epidermis+cortex and stele of roots from AtHMA4- expressing (L.4 and L.15) and wild-type 24-day-old tomato plants grown in the presence of 0.5  $\mu$ M Zn; (d) Relative expression of cyclophilin in epidermis+cortex and stele of roots from AtHMA4- expressing (L.4 and L.15) and wild type 24-day-old tomato plants grown in the presence of 1  $\mu$ M Cd; (e) Relative expression of cyclophilin in palisade parenchyma + upper epidermis and spongy parenchyma + lower epidermis of leaves from AtHMA4- expressing (L.4 and L.15) and wild type 17-day-old tomato plants grown in the presence of 5  $\mu$ M Zn. The relative expression level was calculated for 172 pg of cDNA template used in the reaction. All accessions numbers are from NCBI.

| <b>(a)</b>                                                                                  |              |                                                                                  |              |                                                                                             |              |                                                                                             |              |
|---------------------------------------------------------------------------------------------|--------------|----------------------------------------------------------------------------------|--------------|---------------------------------------------------------------------------------------------|--------------|---------------------------------------------------------------------------------------------|--------------|
| <b>Leaves</b>                                                                               |              |                                                                                  |              |                                                                                             |              |                                                                                             |              |
| L.4 vs WT EPP                                                                               |              | L.4 vs WT ESP                                                                    |              | L.4 ESP vs EPP                                                                              |              | WT ESP vs EPP                                                                               |              |
| Gene                                                                                        | Fold- Change | Gen                                                                              | Fold- Change | Gene                                                                                        | Fold- Change | Gene                                                                                        | Fold- Change |
| <a href="#">ABB13293 beta-tubulin [Lycopersicon esculentum]</a>                             | -1,70126     | <a href="#">ABB13293 beta-tubulin [Lycopersicon esculentum]</a>                  | -2,40579     | <a href="#">ABB13293 beta-tubulin [Lycopersicon esculentum]</a>                             | -1,78593     | <a href="#">ABB13293 beta-tubulin [Lycopersicon esculentum]</a>                             | -1,26293     |
| <a href="#">AAB51592 glyceraldehyde 3-phosphate dehydrogenase [Lycopersicon esculentum]</a> | 1,64479      |                                                                                  |              | <a href="#">AAB51592 glyceraldehyde 3-phosphate dehydrogenase [Lycopersicon esculentum]</a> | 2,24799      | <a href="#">AAB51592 glyceraldehyde 3-phosphate dehydrogenase [Lycopersicon esculentum]</a> | 4,24621      |
| <a href="#">CAA51679 ubiquitin [Solanum lycopersicum]</a>                                   | -1,30168     |                                                                                  |              | <a href="#">CAA51679 ubiquitin [Solanum lycopersicum]</a>                                   | 1,75594      | <a href="#">CAA51679 ubiquitin [Solanum lycopersicum]</a>                                   | 1,413        |
|                                                                                             |              | P17786 RecName: Full=Elongation factor 1-alpha; Short=EF-1-alpha                 | 1,2014       | P17786 RecName: Full=Elongation factor 1-alpha; Short=EF-1-alpha                            | 1,30828      |                                                                                             |              |
|                                                                                             |              |                                                                                  |              | <a href="#">CAA41207 ubiquitin [Solanum lycopersicum]</a>                                   | 1,42027      |                                                                                             |              |
|                                                                                             |              |                                                                                  |              | P17786 RecName: Full=Elongation factor 1-alpha; Short=EF-1-alpha                            | 1,20743      |                                                                                             |              |
|                                                                                             |              |                                                                                  |              | P17786 RecName: Full=Elongation factor 1-alpha; Short=EF-1-alpha                            | 1,20216      |                                                                                             |              |
|                                                                                             |              | <a href="#">P17786 RecName: Full=Elongation factor 1-alpha; Short=EF-1-alpha</a> | -1,3563      | <a href="#">P17786 RecName: Full=Elongation factor 1-alpha; Short=EF-1-alpha</a>            | -1,35314     |                                                                                             |              |
|                                                                                             |              |                                                                                  |              |                                                                                             |              | <a href="#">AAK95390 ribosomal protein L2 [Lycopersicon esculentum]</a>                     | 1,36971      |
| <b>Roots</b>                                                                                |              |                                                                                  |              |                                                                                             |              |                                                                                             |              |
| L.4 vs WT EC                                                                                |              | L.4 vs WT S                                                                      |              | L.4 EC vs S                                                                                 |              | WT EC vs S                                                                                  |              |
| Gen                                                                                         | Fold- Change | Gen                                                                              | Fold- Change | Gen                                                                                         | Fold- Change | Gen                                                                                         | Fold- Change |
| <a href="#">AAB51592 glyceraldehyde 3-phosphate dehydrogenase [Lycopersicon esculentum]</a> | -2,27524     |                                                                                  |              | <a href="#">AAB51592 glyceraldehyde 3-phosphate dehydrogenase [Lycopersicon esculentum]</a> | -2,01383     |                                                                                             |              |

(b)

5  $\mu$ M Zn

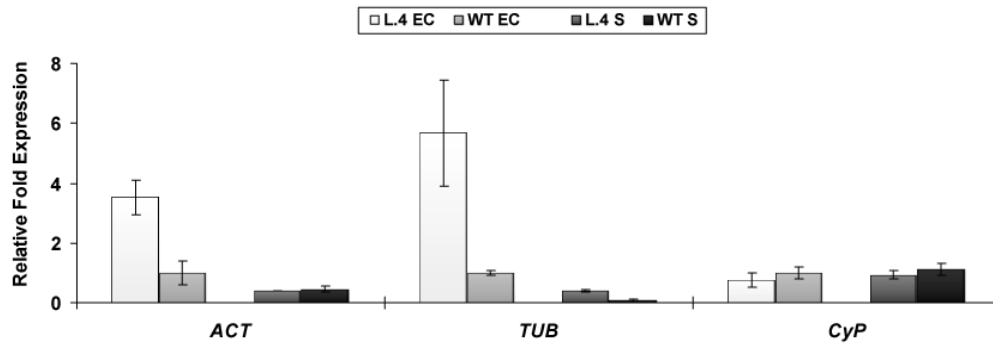

(c)

0.5  $\mu$ M Zn

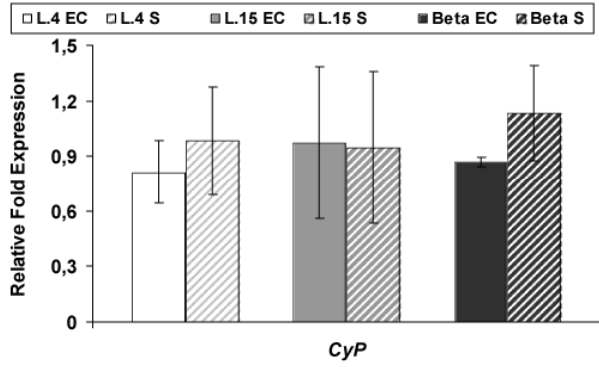

(d)

1.0  $\mu$ M Cd

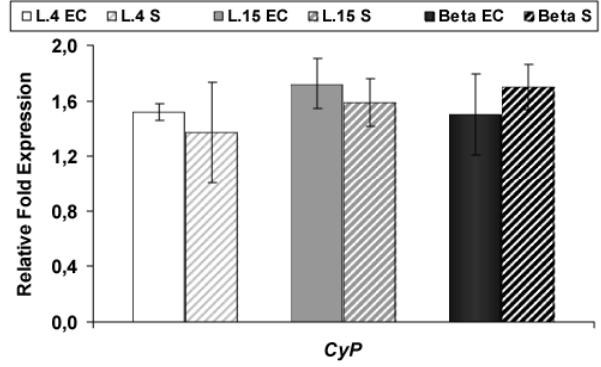

(e)

5.0  $\mu$ M Zn

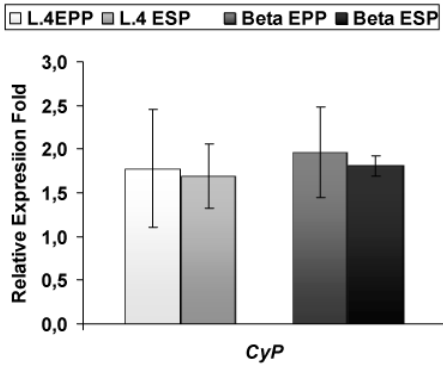

Supplement: 12864_2016_2990_MOESM5_ESM.pdf [file 12864_2016_2990_MOESM5_ESM.pdf]
