# Supplementary material for: Engineering high Zn in tomato shoots through expression of AtHMA4 involves tissue-specific modification of endogenous genes
Source: PubMed Central journal article supplement (PMC4982198; doi:10.1186/s12864-016-2990-x), 2016-08-12
Supplement: 12864_2016_2990_MOESM4_ESM.pdf [file 12864_2016_2990_MOESM4_ESM.pdf]

**Additional file 4. Sequences of primers used for expression analysis.**

| Gene             | NCBI accession number | Primer sequences                                       | Product size |
|------------------|-----------------------|--------------------------------------------------------|--------------|
| <i>NRAMP1</i>    | AY196091              | F: CACTCTGCCCTTGTACTATC<br>R: GTACCAGACACAGACACAAC     | 142          |
| <i>NRAMP2</i>    | AY562196              | F: GGAGCTTTTAGCAGGTCTCT<br>R: GATCTCTCTGGATTGCACCA     | 133          |
| <i>NRAMP3</i>    | AY196092              | F: TGTTTGGAGAGACGAAACCA<br>R: ACACCCTACAATTCCCCTG      | 104          |
| <i>IRT1</i>      | AF136579              | F: TCCTACAGGCGGAGTATAAG<br>R: CAGTTATTAACGCCCGTGGA     | 138          |
| <i>FRO1</i>      | AY224079              | F: CTCTACCAGATGATCTCCTCC<br>R: GAGTAATTCCACTTCCTCCAC   | 135          |
| <i>NbABC</i>     | AY943856              | F: TCCACTGTGCAGAACTGGTATG<br>R: TGACCCTGTCTCCACTTGTG   | 129          |
| <i>Chln</i>      | AJ242045              | F: GGTGCCTATGTGTTACCTAG<br>R: CTCACTCACTCCTCCAGAG      | 106          |
| <i>FER</i>       | AF437878              | F: GCAACAAAG GCGCACACATTG<br>R: CCAACGGAGATGTCTCGAAGTC | 228          |
| <i>bZIP44</i>    | FJ647190              | F: ACAGTGGACTTGTCTATGGACC<br>R: TGCAAGACATCGGCAGTC     | 141          |
| <i>NR</i>        | U38666                | F: GCTCGATGTAAAAATCCGATGG<br>R: CACTGA ACTACTACTCCACG  | 101          |
| <i>ETR1</i>      | NM_001247220          | F: TCTAAGCTCCCCTTTGTGAC<br>R: CATCCAAGGTGTGTAAGCAG     | 134          |
| <i>ACO1</i>      | NM_001247095          | F: CTAACGGGAAGTACAAGAGTGTG<br>R: TCCTCTGCCTCTTTTTCAACC | 151          |
| <i>ACO3 (E8)</i> | XM_004247652          | F: GCTGCAAGTTGGAGAGACAC<br>R: CCTCTGCCACTGAGCTACT      | 134          |
| <i>ACO4</i>      | NM_001246999          | F: TGACGCGGTGATCTATCCA<br>R: CCACATTAGCTTCCATAGCCT     | 158          |
| <i>ACO5</i>      | AJ715790              | F: TCTTTGTTTGGCATCGTCCA<br>R: CTAGGCCAAGGTTCTCACAC     | 147          |
| <i>ACO6</i>      | NM_001247709          | F: GCTCACACAGATGCTGGTG<br>R: GAGTTGGTCACCGAGGTTG       | 138          |
| <i>PMEU1</i>     | U70677                | F: GTGGCCGGAGTGGTTGTCCG<br>R: CGCAGAGTGCCACGGCTTGA     | 395          |
| <i>EXP8</i>      | AF184232              | F: GGAGGTGCTTGTGGATATG<br>R: CCTTTTTGCACCATTGAGG       | 154          |
| <i>EXP18</i>     | AJ004997              | F: GTTGGAGGTGAAAGGGGAAG<br>R: CGGGCTACATGTTTTTGCAG     | 118          |
| <i>uJ-2</i>      | X55686                | F: GGAACCAAACCATCACCAC<br>R: CGTAGGAGACTCCGATTACC      | 197          |
| <i>THT7-1</i>    | AY081906              | F: CTCAACAACCAACTCCATCTC<br>R: TCAAGTAGA AGTACGGATGG   | 264          |
| <i>THT7-8</i>    | AY081907              | F: GCATCATCGGAAAACAACAAC<br>R: TCAAGTAGA AGTACGGATGG   | 223          |
| <i>XTH1</i>      | NM_001246929          | F: TGAGGCTTGTGGTGGAGAC<br>R: CTCTGTTTCCTTTTCCTCCTGTG   | 162          |

---

|                                 |              |                                                       |     |
|---------------------------------|--------------|-------------------------------------------------------|-----|
| <i>XTH3</i>                     | NM_001247543 | F: GTCATCACAAGGACCAACAC<br>R: TGGAAATCAGCAGTAGGGTC    | 156 |
| <i>XTH7</i>                     | NM_001245746 | F: GGAACCATCATCAAGCCGTG<br>R: CTCTTGTAGCCCAGTCGTCAG   | 147 |
| <i>iXET-B1</i>                  | X82685       | F: CTATGTCCTGTTTGGGCTGA<br>R: CAAGGGACAAGGCGAGAAG     | 106 |
| <i>Cel 2</i><br><i>AAA69909</i> | U13055       | F: GAAAGCTACGGCGAGAGATGG<br>R: ACATCGGAACCGGGATTATTCG | 141 |
| <i>Cel 5</i><br><i>AAC62241</i> | U78526       | F: GGTTCTGATGTTGCTGCTGAG<br>R: GCAGACCACTGAACTGAGACTG | 171 |
| <i>Cel 7</i><br><i>CAA72133</i> | AF308936     | F: GAGCTATATTGGGGAGCAGC<br>R: GTCATTTCCTACCACGCTTCTCC | 168 |
| <i>CyP</i>                      | NM_001247559 | F: CTCTTCGCCGATACTACTCC<br>R: TCACACGGTGGAAGGTTGAG    | 120 |

---
