# Supplementary material for: Engineering high Zn in tomato shoots through expression of AtHMA4 involves tissue-specific modification of endogenous genes
Source: PubMed Central journal article supplement (PMC4982198; doi:10.1186/s12864-016-2990-x), 2016-08-12
Supplement: 12864_2016_2990_MOESM6_ESM.pdf [file 12864_2016_2990_MOESM6_ESM.pdf]

**Additional file 6: Zn concentration in roots and leaves .**

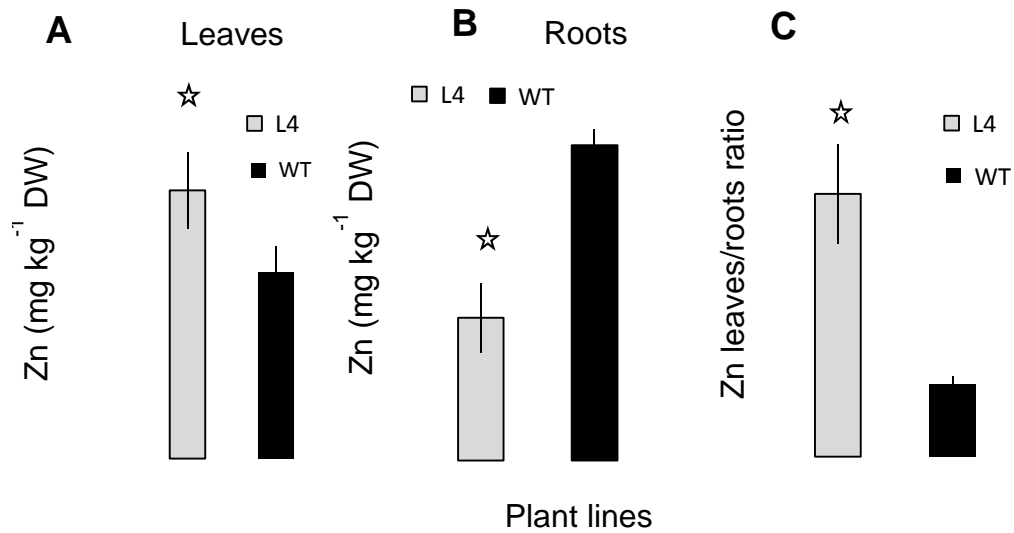

Zn concentration in 24-day old transgenic (line 4) and wild-type (WT) plants exposed to 5  $\mu$ M Zn for 2 weeks. Zn concentration in leaves (A); roots (B); leaves/roots Zn, concentration ratio (C). Values correspond to arithmetic means  $\pm$  SD (n=6); values significantly different from WT are highlighted by an asterisk ( $P \leq 0.05$ ) (evaluated by Student's *t*-test).
