# Supplementary material for: Engineering high Zn in tomato shoots through expression of AtHMA4 involves tissue-specific modification of endogenous genes
Source: PubMed Central journal article supplement (PMC4982198; doi:10.1186/s12864-016-2990-x), 2016-08-12
Supplement: 12864_2016_2990_MOESM8_ESM.pdf [file 12864_2016_2990_MOESM8_ESM.pdf]

(line 4) as compared with the wild-type (WT) grown in the presence of 5  $\mu$ M Zn for one week. Tomato genes were classified by GO of biological processes using the sequences from the Tomato Functional Genomics Database and GO tools available on the TFGD website.
