# Supplementary material for: Engineering high Zn in tomato shoots through expression of AtHMA4 involves tissue-specific modification of endogenous genes
Source: PubMed Central journal article supplement (PMC4982198; doi:10.1186/s12864-016-2990-x), 2016-08-12
Supplement: 12864_2016_2990_MOESM13_ESM.pdf [file 12864_2016_2990_MOESM13_ESM.pdf]

**Additional file 13: Alteration in transcript levels of selected genes identified in leaves by microarrays and verified by RT-qPCR.** Changes in expression levels in lower epidermis+spongy paerenchyma (ESP) and upper epidermis+palisade paerenchyma (EPP) of leaves of 17-day old transgenic plants line 4 versus wild type Beta grown for one week in the presence of 5  $\mu$ M Zn.

↑ - upregulated, ↓ - downregulated, “blank” - similar transcript level

In cases where transcripts were detected by Real-time PCR in one tissue type only, fold change could not be calculated. The results are then shown as arrows indicating the course of change.

All accessions numbers are from NCBI.

| Accession number                                   | Gene product                                                                | Microarray  |                          |             |                          | RT-qPCR     |             |
|----------------------------------------------------|-----------------------------------------------------------------------------|-------------|--------------------------|-------------|--------------------------|-------------|-------------|
|                                                    |                                                                             | ESP         |                          | EPP         |                          | ESP         | EPP         |
|                                                    |                                                                             | Fold change | p-value                  | Fold change | p-value                  | Fold change | Fold change |
| <i>Metal transporters and uptake facilitators:</i> |                                                                             |             |                          |             |                          |             |             |
| AY562196                                           | Natural resistance-associated macrophage protein 2 ( <i>NRAMP2</i> )        |             |                          | ↑ 1.3       | 0.0128031                | ↓           | ↑           |
| AY196092                                           | Natural resistance-associated macrophage protein 3 ( <i>NRAMP3</i> )        | ↑ 1.2       | 0.000992745              | ↑ 1.2       | 0.000972334              |             | ↑           |
| AY224079                                           | Ferric-chelate reductase ( <i>FRO1</i> )                                    | ↑ 1.5       | 1.23958e <sup>-005</sup> | ↑ 1.8       | 0.000162441              | ↓           | ↑           |
| <i>Transcription factors:</i>                      |                                                                             |             |                          |             |                          |             |             |
| FJ647190                                           | Basic region/leucine zipper motif transcription factor 44 ( <i>bZIP44</i> ) | ↑ 17.4      | 1.32234e <sup>-011</sup> | ↑ 11.3      | 3.52978e <sup>-012</sup> | ↑           | ↑           |
| <i>Ethylene pathway:</i>                           |                                                                             |             |                          |             |                          |             |             |
| NM_001247220                                       | Ethylene receptor 1 ( <i>ETR1</i> )                                         |             |                          | ↑ 1.3       | 0.000651449              | ↓           | ↑           |
| U38666                                             | Never-ripe ethylene receptor ( <i>NR</i> )                                  | ↑ 1.3       | 0.00391666               | ↑ 1.6       | 0.00014986               | ↓           | ↓           |
| NM_001247095                                       | 1-Aminocyclopropane-1-carboxylate oxidase 1 ( <i>ACO1</i> )                 | ↑ 171.5     | 3.99087e <sup>-011</sup> | ↑ 165.7     | 4.21099e <sup>-011</sup> | ↓           | ↑           |
| XM_004247652                                       | 1-Aminocyclopropane-1-carboxylate oxidase 3 ( <i>ACO3</i> , <i>E8</i> )     | ↑ 2.1       | 0.00247568               | ↓ -1.7      | 0.000165337              | ↑           | ↓           |

|                                 |                                                               |        |                          |        |                          |   |   |
|---------------------------------|---------------------------------------------------------------|--------|--------------------------|--------|--------------------------|---|---|
| NM_001246999                    | 1-Aminocyclopropane-1-carboxylate oxidase 4 ( <i>ACO4</i> )   | ↑ 5.6  | 2.01684e <sup>-006</sup> | ↑ 5.5  | 2.1916e <sup>-006</sup>  | ↓ | ↑ |
| NM_001247709                    | 1-Aminocyclopropane-1-carboxylate oxidase 6 ( <i>ACO6</i> )   |        |                          | ↑ 1.5  | 1.15738e <sup>-006</sup> | ↓ | ↓ |
| <i>Cell wall modifications:</i> |                                                               |        |                          |        |                          |   |   |
| U70677                          | Pectin methylesterase 1 ( <i>PMEU1</i> )                      | ↑ 1.3  | 9.51282e <sup>-007</sup> | ↑ 1.7  | 2.85617e <sup>-009</sup> | ↑ | ↑ |
| NM_001246929                    | Xyloglucan endotransglucosylase/hydroxylase 1 ( <i>XTH1</i> ) | ↓ -3.2 | 2.13345e <sup>-007</sup> | ↓ -2.7 | 7.03154e <sup>-007</sup> | ↓ | ↓ |
| NM_001247543                    | Xyloglucan endotransglucosylase/hydroxylase 3 ( <i>XTH3</i> ) | ↑ 12.0 | 8.1219e <sup>-009</sup>  | ↑ 1,8  | 0.000299818              |   | ↑ |
| NM_001245746                    | Xyloglucan endotransglucosylase/hydroxylase 7 ( <i>XTH7</i> ) | ↓ -2.1 | 0.000310681              | ↓ -2.8 | 2.92569e <sup>-005</sup> | ↑ | ↓ |
| U13055                          | endo-1,4-beta-D-glucanase ( <i>Cel2</i> )                     |        |                          | ↓ -6.9 | 4.99676e <sup>-006</sup> | ↓ | ↓ |
| U78526                          | endo-1,4-beta-D-glucanase ( <i>Cel5</i> )                     | ↓ -4.6 | 2.86733e <sup>-006</sup> |        |                          | ↓ | ↑ |
| AF308936                        | endo-1,4-beta-D-glucanase ( <i>Cel7</i> )                     | ↑ 25.1 | 2.63431e <sup>-011</sup> | ↑ 2.2  | 1.72706e <sup>-006</sup> | ↑ | ↑ |
