# Supplementary material for: Engineering high Zn in tomato shoots through expression of AtHMA4 involves tissue-specific modification of endogenous genes
Source: PubMed Central journal article supplement (PMC4982198; doi:10.1186/s12864-016-2990-x), 2016-08-12
Supplement: 12864_2016_2990_MOESM14_ESM.pdf [file 12864_2016_2990_MOESM14_ESM.pdf]

## Additional file 14: Alignments of LeNRAMP2 with NRAMPs from other plant species

### Part A

Alignment of predicted protein sequence LeNRAMP2 (XP\_004238113.1, published in 2014, longer than AAS67887) with NRAMP2 proteins from *Arabidopsis thaliana* (AtNRAMP2 - NP\_175157.1), *Oryza sativa* (OsNRAMP2 - AAB61961.1) and *Mus musculus* (mouse\_NRAM2 - NP\_001139633.1) Alignment was done using Clustal Omega program (<http://www.ebi.ac.uk/Tools/msa/clustalo/>). Residues were shaded with BoxShade ([http://www.ch.embnet.org/software/BOX\\_form.html](http://www.ch.embnet.org/software/BOX_form.html)). Black and grey backgrounds indicate identical residues and conservative substitutions. Lines above the sequences indicate the positions of the transmembrane domains (TM). TM prediction program was used for prediction of transmembrane domain of LeNRAMP2 protein: ([http://www.ch.embnet.org/software/TMPRED\\_form.html](http://www.ch.embnet.org/software/TMPRED_form.html)). The Consensus Transport Motif (CTM) between TMs 8 and 9 is boxed (according to Curie [21] –reference from the manuscript ). Percent Identity Matrix created by Clustal2.1 is shown below alignment (rounded off to one decimal place). All accessions numbers are from NCBI.

```

LeNRAMP2      1  -MSSP-QQENTSP--DSKEEESRHLTLAPLPQSTSPHINGDADDGEEEFVYGSGEKIHV
AtNRAMP2      1  -----MENDVK--ENLEEEEDRLLPPPPPSQSLPS-----TDSESEAAFETNEKILI
OsNRAMP2      1  -----
mouse_NRAM2   1  MVLDPKEKMPDDGASGDHGDSSASLGAINPAYSNSSLPHSTG---DSEEPFTTYFDEKI--
  
```

```

                                     TM I
LeNRAMP2      57  VEFDSVPIDGVDYSTVPPFSWKKLWQFTGPGFLMSIAFLDPGNLEGDLQAGAIAGYSLLW
AtNRAMP2      46  VDFES-PDDPTTGDTPPPFSWRKLLWFTGPGFLMSIAFLDPGNLEGDLQAGAIAGYSLLW
OsNRAMP2      1   -----MRPAFSWRKLRWFTGPGFLMCIAFLDPGNLEGDLQAGAAAGYQLLW
mouse_NRAM2   56  -----P---IPEEEYSCFSFRKLWAF TGPGLMSIAYLDPGNIESDLQSGAVAGFKLLW
  
```

```

                TM II                      TM III
LeNRAMP2      117  LLLWATVMGLMIQLLSARIGVATGRHLAELCREEYPRWAGLLLWFMAEVALIGADIQEV
AtNRAMP2      105  LLMWATAMGLLIQMLSARVGVATGRHLAELCRDEYPTWARYVLWSMAELALIGADIQEV
OsNRAMP2      47   LLLWATVMGALVQLLSARLGVATGKHLAELCREEYPPWATAALWAMTELALVGADIQEV
mouse_NRAM2   107  VLLLATIVGLLLQRLAARLGVVTGLHLAEVCHRQYPKVPRIILWLMVELAIIGSDMQEVI
  
```

```

                TM IV                      TM V
LeNRAMP2      177  GSAIAIKILSRGVLPLWAGVLITASDCFLLLVLNENYGIKLEAVFAVLISTMALSFAWMF
AtNRAMP2      165  GSAIAIQILSRGFLPLWAGVVIITASDCFLLFLLENYGVKLEAVFAVLIATMGLSFAWMF
OsNRAMP2      107  GSAIAIKILSAGTVPLWGGVVIITAFDCFIFLFLLENYGVKLEAFFGVLIAMAVSFAIMF
mouse_NRAM2   167  GSAIAINLLSAGRVPLWGGVLIITADTFVFLFLDKYGLRKLEAFFGFLITIMALTFGYEY
  
```

```

                                     TM VI
LeNRAMP2      237  GDAKPNGKELLAGLLIPKLS---SRTVRQAVGVVGCVIMPHNVFLHSALVQSREIDLKKK
AtNRAMP2      225  GETKPSGKELMIGILLPRLS---SKTIRQAVGVVGCVIMPHNVFLHSALVQSRKIDPKRK
OsNRAMP2      167  GETKPSGKDLLIGLVVVKLS---SRTIKQAVGIVGCIIMPHNVFLHSALVESRKIDTNKK
mouse_NRAM2   227  ITVKPSQSQVLRGMFVPSCPGCRTPQVEQAVGIVGAVIMPHNMYLHSALVKSRQVNRANK
  
```

```

                                     TM VII
LeNRAMP2      294  GQVQEALNYYSIIESSFALLISFMINLFVTTVFAGKFGYQAGSLGLVNA-----
AtNRAMP2      282  SRVQEALNYYLIESSVALFISFMINLFVTTVFAGKFGYTEKANNIGLVNA-----
OsNRAMP2      224  SRVQEAFFYYNIESILALVVSFFINICVTTVFAGKFGYQADGIGLENA-----
mouse_NRAM2   287  QEVREANKYFFIESCIALFVSFIINVFVSVFAEAFFEKTNKQVVEVCKNNSPHADLFP
  
```

```

                                     TM VIII
LeNRAMP2      344  ---GQFLQDKYGGGL-----FPILYIWGIGLLAAGQSSTITGTYAGQFIMGGFLDLRL
AtNRAMP2      332  ---GQYLQEKFGGGL-----LPILYIWGIGLLAAGQSSTITGTYAGQFIMGGFLNLRRL
OsNRAMP2      274  ---GQYLQQKYGTAF-----FPILYIWAIGLLASGQSSTITGTYAGQFVMGGFLNLRRL
mouse_NRAM2   347  SDNSTLAVDIYKGGVVLGCYFGPAALYIWAIVGILAAAGQSSTMTGTYSGQFVMEGFLNLRK
  
```

```

                                TM IX                                TM X
LeNRAMP2      394  KKWLRLALITRSCAIVPTIIVALIFNRSESSLDVLEWLNVLQSIQIPFALIPLLTLSKE
AtNRAMP2      382  KKWMRAVITRSCAIVPTMIVAIVFNTSEASLDVLEWLNVLQSVQIPFALLPLLTLSKE
OsNRAMP2      324  KKWLRAMITRSFAIIPITMIVALFFDTEPTMDILNEALNVLQSIQIPFALIPLITLSKE
mouse_NRAMP2  407  SRFARVILTRSAIIPITLLVAVFQDVE--HLTGMNDFLNVLQSLQLPFALIPIILFTSLR

                                TM XI                                TM XII
LeNRAMP2      454  DIMGTFKIGPALERVAWTIAVLVMVINGYLLLDFFVSEVNGPLFAFLVCAGTAGYVAFIL
AtNRAMP2      442  EIMGDFKIGPILQRIAWTVAALVMIINGYLLLDFFVSEVDGFLFGVTVCVWTTAYIAFIV
OsNRAMP2      384  QVMGSFVVGPITKVISWIVTVFLMLINGYLILSFYATEVRGALVRSSLCVVLAVYLAFIV
mouse_NRAMP2  465  PVMSEFSNGIGWRIAGGILVLIIVCSINMYFVVV-YVQELGHVALYVVAAVSVAYLTFVF

LeNRAMP2      514  YLISHGGGNVANWFNLLRTKG--YSYAGQ-----
AtNRAMP2      502  YLISHSNFFPSPWSSSSSIELPKRVSVSNS-----
OsNRAMP2      444  YLIMQNTSLYSRLRSAMTKST-----
mouse_NRAMP2  524  YLGWQCLIALG---LSFLDCGRSVSISKVLLSEDTSGGNIK

```

|                 | 1     | 2     | 3     | 4     |
|-----------------|-------|-------|-------|-------|
| 1: LeNRAMP2     | 100.0 | 74.2  | 68.7  | 44.6  |
| 2: AtNRAMP2     | 74.2  | 100.0 | 70.3  | 46.2  |
| 3: OsNRAMP2     | 68.7  | 70.3  | 100.0 | 50.0  |
| 4: mouse_NRAMP2 | 44.6  | 46.2  | 50.0  | 100.0 |

## Part B

Alignment of predicted protein sequence LeNRAMP2 (XP\_004238113.1, published in 2014, longer than AAS67887) with NRAMPs proteins from *Arabidopsis thaliana* (AtNRAMP1- NP\_178198.1, AtNRAMP2- NP\_175157.1, AtNRAMP3 - NP\_179896.1, AtNRAMP4 - NP\_201534.1, AtNRAMP5 - NP\_193614.1, AtNRAMP6 - NP\_173048.3, and *Noccaea caerulescens* (formerly *Thlaspi caerulescens*, TcNRAMP3 - ABR27746.1, TcNRAMP4 - ABR27747.1) Alignment was done using Clustal Omega program. Residues were shaded with BoxShade ([http://www.ch.embnet.org/software/BOX\\_form.html](http://www.ch.embnet.org/software/BOX_form.html)). Black and grey backgrounds indicate identical residues and conservative substitutions. Lines above the sequences indicate the positions of the transmembrane domains. TM prediction program was used ([http://www.ch.embnet.org/software/TMPRED\\_form.html](http://www.ch.embnet.org/software/TMPRED_form.html)) for prediction of transmembrane domain of LeNRAMP2 protein. The Consensus Transport Motif (CTM) between TMs 8 and 9 is boxed (according to Curie [21] –reference from the manuscript) Percent Identity Matrix created by Clustal2.1 is shown below alignment (rounded off to one decimal place) All accessions numbers are from NCBI.

```

LeNRAMP2      1  ----MSSPQQQENTSPDSKEEESRHLLETAPLPQSTSPLINGDADDGEEEFVYGSGEKIHV
AtNRAMP2      1  -----MENDVKENLEEEEDRLLPPLPP-----PPSQSLPSTDSESEAAAFETNEKILI
AtNRAMP3      1  -----MPQLENNE-----PLLINNE--EEEEETAYDETEKVIH
TcNRAMP3      1  -----MSRLENDR-----PLLIDRIDEEEETAYDETEKVIH
TcNRAMP4      1  -----MSETERER-----PLLA-----SEERAYEETEKVHI
AtNRAMP4      1  -----MSETDRER-----PLLA-----SEERAYEETEKVLI
AtNRAMP5      1  MTGSTVSRQENSPKRPNDNNGEFKRLLPVETSQ-----PEEDELHESPPENQI
AtNRAMP6      1  -----MAAETASGSNRSI
AtNRAMP1      1  -----MAATGSGR-----SQFISSSGGNRSF

```

TM I

LeNRAMP2 57 VEFDSVPIDGVY----STVPPFSWKKLWQFTGPGFLMSIAFLDPGNLEGLDQAGAIAGY  
 AtNRAMP2 46 VDFESPDDP-----TTGDTPPPPFSWRKLWLF TGPGLMSIAFLDPGNLEGLDQAGAIAGY  
 AtNRAMP3 31 VRNEE--EDDLEHGVGCGGAPPF SWKKLWLF TGPGLMSIAFLDPGNLEGLDQAGAVAGY  
 TcNRAMP3 33 VRDEDDNERDLEYGVGCGGAPPF SWRKLWLF TGPGLMSIAFLDPGNLEGLDQSGAVAGY  
 TcNRAMP4 27 VGVDE--EDDANYD-ELGNAPRF SWKKLWLF TGPGLMSIAFLDPGNLES DLQAGAIAGY  
 AtNRAMP4 27 VGIDE--EEDADYDDDPGNSPKF SWKKLWLF TGPGLMSIAFLDPGNLES DLQAGAIAGY  
 AtNRAMP5 49 LNVEE-----DRDKTYDSVPPF SWAKLWKF TGPGLMSIAFLDPGNIEGLDQAGAVAGY  
 AtNRAMP6 14 S--NSPLIEN-SDSNQILVPEKKS WKNF SYLGPGLVSIAYIDPGNFETDLQSGAQYKY  
 AtNRAMP1 22 S--NSPLIEN-SDSNQIIVSEKKS WKNF FAYLGPGLVSIAYIDPGNFETDLQAGAHYKY

TM II TM III

LeNRAMP2 113 SLLWLLLWATVMGLMIQLLSARIGVATGRHLAELCREEYPRWAGLLLWFMAEVALIGADI  
 AtNRAMP2 101 SLLWLLMWATAMGLLIQMLSARVGVATGRHLAELCRDEYPTWARYVLWSMAELALIGADI  
 AtNRAMP3 89 SLLWLLMWATAMGLLVQLLSARLGVATGRHLAELCRDEYPTWARMVLWVMAELALIGSDI  
 TcNRAMP3 93 SLLWLLMWATAMGLLVQLLSARLGVATGRHLAELCREEYPSWAGMVLWVMAELALIGSDI  
 TcNRAMP4 84 SLIWLLMWATAIGLLIQLLSARLGVATGRHLAELCREEYPTWARMVLWVMAEIALIGADI  
 AtNRAMP4 85 SLIWLLMWATAIGLLIQLLSARLGVATGRHLAELCREEYPTWARMVLWVMAEIALIGADI  
 AtNRAMP5 103 SLLWLLLWATLMGLLMLQLLSARIGVATGRHLAEICRSEYPSWARILLWFMAEVALIGADI  
 AtNRAMP6 71 ELLWIIIVASCAALVIQSLAANLGVVTGKHLAEHCRAEYSKVPNFMLWVVAEIAVVACDI  
 AtNRAMP1 79 ELLWIIIVASCAALVIQSLAANLGVVTGKHLAEQCRAEYSKVPNFMLWVVAEIAVVACDI

TM IV TM V

LeNRAMP2 173 QEVI GSAIAIAIKILSRGVLPLWAGVLITASDCFLLLVLENYGIRKLEAVFAVLI STMALSF  
 AtNRAMP2 161 QEVI GSAIAIAIQILSRGFLPLWAGVVI TADCF LFLFLENYGVRKLEAVFAVLIATMGLSF  
 AtNRAMP3 149 QEVI GSAIAIAIKILSNGILPLWAGVVI TALDC FVFLFLENYGIRKLEAVFAVLIATMGVSF  
 TcNRAMP3 153 QEVI GSAIAIAIKILTNGILPLWAGVVI TALDC FFFLFFENY GIRKLEAVFAVLIATMGVSF  
 TcNRAMP4 144 QEVI GSAIAIAIKILSNGLIPLWAGVVI TALDC FIFLFLFLENYGIRKLEAVFAVLIATMAVAF  
 AtNRAMP4 145 QEVI GSAIAIAIKILSNGLVPLWAGVVI TALDC FIFLFLFLENYGIRKLEAVFAVLIATMALAF  
 AtNRAMP5 163 QEVI GSAIALQILTRGFLPIWVGVI I TSFDC FLISYLEKCGMRKLEGLFAVLIATMALS F  
 AtNRAMP6 131 PEVI GTAFALNMLFN--IPVWIGVLLTGLSTLILLALQQYGIRKLEFLIAFLVFTIALCF  
 AtNRAMP1 139 PEVI GTAFALNMLFS--IPVWIGVLLTGLSTLILLALQKYGVRKLEFLIAFLVFTIAICF

TM VI

LeNRAMP2 233 AWMFGDAKPNGKELLAGLLIPKLSRT-VRQAVGVVGCVIMPHNVFLHSALVQSREIDLK  
 AtNRAMP2 221 AWMFGETKPSGKELMIGILLPRLSSKT-IRQAVGVVGCVIMPHNVFLHSALVQSRKIDPK  
 AtNRAMP3 209 AWMFGQAKPSGSELLIGILVPKLSRT-IQKAVGVVGCIMPHNVFLHSALVQSREVDKR  
 TcNRAMP3 213 AWMFGQAKPSGSELLVIGILVPKLSRT-IQKAVGVVGCIMPHNVFLHSALVQSREVDKR  
 TcNRAMP4 204 AWMFGQTKPSGTELLV GALV PKLSRT- IKQAVGIVGCIMPHNVFLHSALVQSREVDPK  
 AtNRAMP4 205 AWMFGQTKPSGTELLV GALV PKLSRT- IKQAVGIVGCIMPHNVFLHSALVQSREVDPK  
 AtNRAMP5 223 AWMFNETKPSVEELFIGIIPKLSKT-IREAVGVVGCVITPHNVFLHSALVQSRKIDPK  
 AtNRAMP6 189 FVELHYSKPDPEVLYGLFVPQLKNGATGLAISLLGAMVMPHNLFHSALVLSRKIP-R  
 AtNRAMP1 197 FVELHYSKPDPEVLHGLFVPQLKNGATGLAISLLGAMVMPHNLFHSALVLSRKIP-R

TM VII

LeNRAMP2 292 KKGQVQEALNYYSI ESSFALLISFMINLFVTTVFAKGFY GSEQ-----AGSLGLVNAG  
 AtNRAMP2 280 RKSRVQEALNYYLIESSVALFISFMINLFVTTVFAKGFY GTEK-----ANNIGLVNAG  
 AtNRAMP3 268 QKYRVQEALNYYTIESTIALFISFLINLFVTTVFAKGFYNTDL-----ANSIGLVNAG  
 TcNRAMP3 272 QKYRVQEALNYYTIESTLALFVSFLINLFVTTVFAKGFYNTDL-----ADSIGLVNAG  
 TcNRAMP4 263 NRFRVKEALKYYSIESAGALAVSFIINVFVTTVFAKSFYGTDI-----AETIGLVNAG  
 AtNRAMP4 264 KRFRVKEALKYYSIESGALAVSFIINVFVTTVFAKSFYGTDI-----ADTIGLVNAG  
 AtNRAMP5 282 EINRVQEALNYYTIESSAALFVSFMINLFVTA VFAKGFYGTKQ-----ADSIGLVNAG  
 AtNRAMP6 248 SVTGIKEACRYYLIESGLALMVAF LINVSVISVSGAVCNASDLSPEDRASCQDL DLNKAS  
 AtNRAMP1 256 SASGIKEACRYYLIESGLALMVAF LINVSVISVSGAVCNAPNLSPEDRANCEDL DLNKAS

TM VIII

```

LeNRAMP2 345 QFLQDKYGGGLFPILYIWIGIGLLAAGQSSTITGTYAGQFIMGGFLDLRLKKWLRALITRS
AtNRAMP2 333 QYLQEKFGGGLLPILYIWIGIGLLAAGQSSTITGTYAGQFIMGGFLNLRLKKWMRAVITRS
AtNRAMP3 321 QYLQEKYGGGVFPILYIWAIGLLAAGQSSTITGTYAGQFIMGGFLNFKMKKWLRLALITRS
TcNRAMP3 325 QYLQDKYGGGLFPILYIWIGIGLLAAGQSSTITGTYAGQFIMGGFLNFRMKKWMRALITRS
TcNRAMP4 316 QYLQDKYGRGYFPILYIWAIGVLAAGQSSTITGTYAGQFIMGGFLNLKMKKVVRLALITRS
AtNRAMP4 317 QYLQDKYGGGFFPILYIWAIGVLAAGQSSTITGTYAGQFIMGGFLNLKMKKVVRLALITRS
AtNRAMP5 335 YYLQEKYGGGVFPILYIWIGIGLLAAGQSSTITGTYAGQFIMEGFLDLQMEQWLSAFITRS
AtNRAMP6 308 FLLRNVV-GKWS--SKLFAIALLASGQSSTITGTYAGQYVMQGFLDLRLEPWLRLNLLTRC
AtNRAMP1 316 FLLRNVV-GKWS--SKLFAIALLASGQSSTITGTYAGQYVMQGFLDLRLEPWLRLNLLTRC

```

TM IX TM X

```

LeNRAMP2 405 CAIVPTIIIVALIFNRSESSLVDLNEWLNVLQSIQIPFALIPLLTLVSKEDIMGTFKIGPA
AtNRAMP2 393 CAIVPTMIVAIVFNTSEASLDLNEWLNVLQSVQIPFALLPPLLTLVSKKEIMGDFKIGPI
AtNRAMP3 381 CAIIPTIIIVALVFDSSSEATLDLNEWLNVLQSIQIPFALIPLLCLVSKEQIMGSFKIGPL
TcNRAMP3 385 CAIIPTIIIVALVFDSSSEATLDLNEWLNVLQSIQIPFALIPLLCLVSKERIMGSFKIGPL
TcNRAMP4 376 CAIIPTMIVALVFDSSASMLDELNEWLNVLQSVQIPFAVIPLLLCLVSNEQIMGSFKIQPL
AtNRAMP4 377 CAIIPTMIVALVFDSSSDSMLDELNEWLNVLQSVQIPFAVIPLLLCLVSNEQIMGSFKIQPL
AtNRAMP5 395 FAIVPTMFVAIMFNTSEGLDVLNEWLNILQSMQIPFAVIPLLLTMVSNEHIMGVFKIGPS
AtNRAMP6 365 LAIIPSLIVALIGGSAGAGK--LIIIASMILSFELPFALVPLLKFTSCKTKMGSHANSLV
AtNRAMP1 373 LAIIPSLIVALIGGSAGAGK--LIIIASMILSFELPFALVPLLKFTSCKTKMGSHVNPMA

```

TM XI TM XII

```

LeNRAMP2 465 LERVAWTIAVLVMVINGYLLLDFFVSEVNG-----PLFAFLVCAGTAGYVAFILYLI
AtNRAMP2 453 LQRIAWTVAALVMIINGYLLLDFFVSEVDG-----FLFGVTVCVWTTAYIAFIVYLI
AtNRAMP3 441 YKTIAWLVAALVIMINGYLLLEFFSNEVSG-----IVYTGFTVLTASYGAFILYLI
TcNRAMP3 445 CQTIAWLVAALVIMINGYLLIEFFSSEVSG-----IVYTGFTVFTALYGAFIVYLI
TcNRAMP4 436 VQTI SWIVAALVISINGYLMVDFFSGAATN-----VLLLVLIIFAVAYVLFVLYLI
AtNRAMP4 437 VQTI SWIVAALVIAINGYLMVDFFSGAATN-----LILLVPVIFAIAYVLFVLYLI
AtNRAMP5 455 LEKLAWTVAVFVMMINGYLLLDFFMAEVEG-----FLVGFLVFGGVGYISFIIYLV
AtNRAMP6 423 ISSVTWIIIGGLIMGINIYYLVSSFIKLLHSHMNLVAIVFLGVLGFSGIATYLA AISYLV
AtNRAMP1 431 ITALTWVIGGLIMGINIYYLVSSFIKLLHSHMKLILVVF CGILGFAGIALYLA AIAYLV

```

```

LeNRAMP2 517 SHGGGNVANWFNLLRTKG----YSYAGQ-----
AtNRAMP2 505 SHSNFFPSPWSSS--SIE----LPKRVSVSNS-----
AtNRAMP3 493 ARGITF-TPWPFKAESSH-----
TcNRAMP3 497 ARGINF-TPWRPKAESS-----
TcNRAMP4 488 SRGLTY-TPCN-----
AtNRAMP4 489 SRGLTY-TPWQLVASSHK----EPQRDDE-----
AtNRAMP5 507 SYRSSQSSWSSEMSESR----VVSTET-----
AtNRAMP6 483 LRKNRESSSTHFLDFSNSQTEETLPREDIANMQLPNRVAVIGDLN
AtNRAMP1 491 FRKNRVATS--LLISRDSQNVETLPRQDIVNMQLPCR VSTS DVD-

```

|             | 1     | 2     | 3     | 4     | 5     | 6     | 7     | 8     | 9     |
|-------------|-------|-------|-------|-------|-------|-------|-------|-------|-------|
| 1: LeNRAMP2 | 100.0 | 74.2  | 72.1  | 71.5  | 69.6  | 68.2  | 67.6  | 40.7  | 40.2  |
| 2: AtNRAMP2 | 74.2  | 100.0 | 74.7  | 73.9  | 70.9  | 70.5  | 70.3  | 38.7  | 37.4  |
| 3: AtNRAMP3 | 72.1  | 74.7  | 100.0 | 92.1  | 78.1  | 76.4  | 66.1  | 39.5  | 38.4  |
| 4: TcNRAMP3 | 71.5  | 73.7  | 92.1  | 100.0 | 76.7  | 75.6  | 65.8  | 39.2  | 38.3  |
| 5: TcNRAMP4 | 69.6  | 70.9  | 78.1  | 76.7  | 100.0 | 94.4  | 63.4  | 40.0  | 39.2  |
| 6: AtNRAMP4 | 68.2  | 70.5  | 76.4  | 75.6  | 94.4  | 100.0 | 62.0  | 39.3  | 38.9  |
| 7: AtNRAMP5 | 67.6  | 70.3  | 66.1  | 65.8  | 63.4  | 62.0  | 100.0 | 37.9  | 36.7  |
| 8: AtNRAMP6 | 40.7  | 38.7  | 39.5  | 39.2  | 40.0  | 39.3  | 37.9  | 100.0 | 87.2  |
| 9: AtNRAMP1 | 40.2  | 37.4  | 38.4  | 38.3  | 39.2  | 38.9  | 36.7  | 87.2  | 100.0 |
